# Supplementary material
Source: PubMed Central journal article supplement (PMC6893292)
Supplement: EMBR-20-e48297-s002.pdf [file EMBR-20-e48297-s002.pdf]

## Expanded View Figures

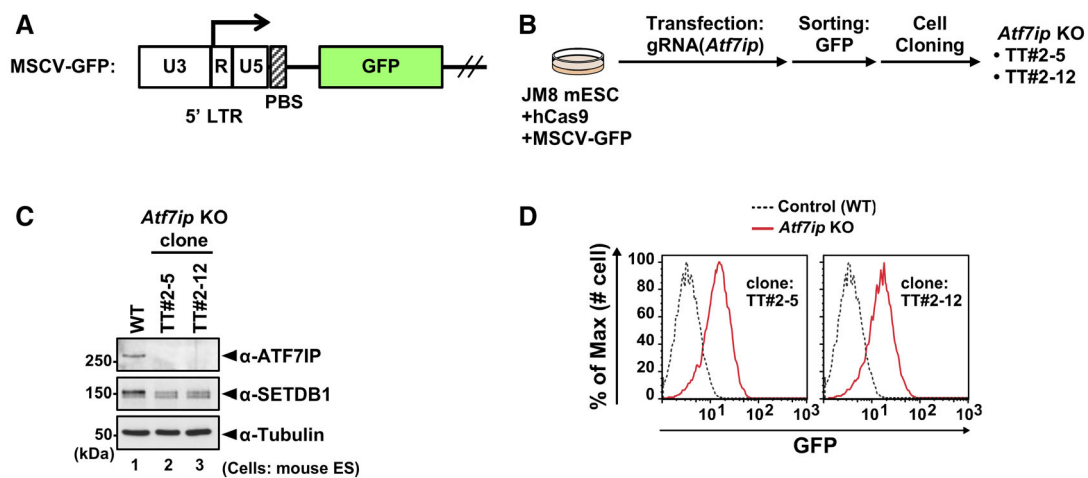

**Figure EV1. Establishment and characterization of *Atf7ip* KO mESCs (related to Fig 1).**

A The structure of MSCV-GFP reporter construct. PBS: primer binding site.

B Establishment of *Atf7ip* KO cell lines by CRISPR/Cas9 technology.

C Confirmation of a complete loss of ATF7IP protein and comparable expression of SETDB1 in the parental WT and established *Atf7ip* KO cell lines, TT#2-15 and TT#2-12, by WB analysis.

D Flow cytometric analysis shows that *Atf7ip* KO cell lines increase the expression of MSCV-GFP reporter.

Source data are available online for this figure.

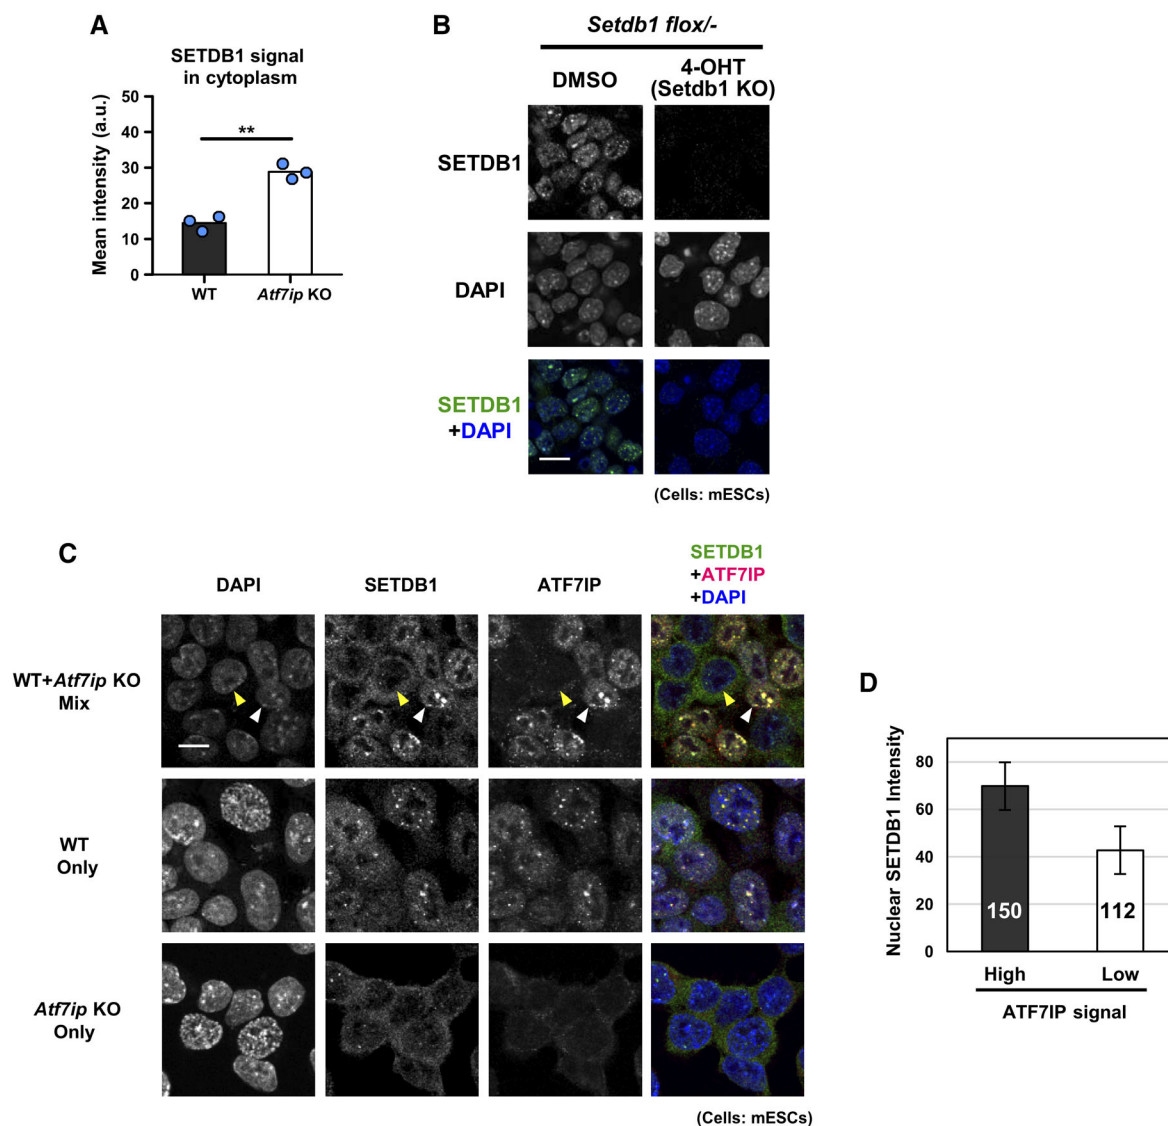

**Figure EV2. Reduction of nuclear SETDB1 in *Atf7ip* KO mESCs (related to Fig 2).**

- A SETDB1 signal in the cytoplasm that is shown in Fig 2A was calculated. The mean from three independent experiments is shown as a bar graph with jittered points indicating the average % intensity of each experiment. Over 100 cells were analyzed per sample per experiment.  $**P < 0.001$  by unpaired Student's *t*-test.
- B Validation of anti-SETDB1 antibody used in this study by IF analysis. Conditional *Setdb1* KO mESCs show no signal after 4-OHT treatment to deplete SETDB1. Scale bar: 7.33  $\mu$ m.
- C Immunostaining of ATF7IP as shown in Fig 2A was conducted using a mixture of WT and *Atf7ip* KO mESCs (1:1) (top) in addition to WT (middle) or *Atf7ip* KO (bottom) alone. The yellow and white arrowhead indicates ATF7IP signal high and low cell which are supposedly WT and *Atf7ip* KO cell, respectively. Scale bar: 10  $\mu$ m.
- D SETDB1 signal in the nucleus of ATF7IP high and low cells as shown in (C) top panel was calculated. The mean with SD is shown as a bar graph. Over 100 of each cell type (150 and 112 for ATF7IP high and low cells, respectively) was analyzed. Error bars: SD.

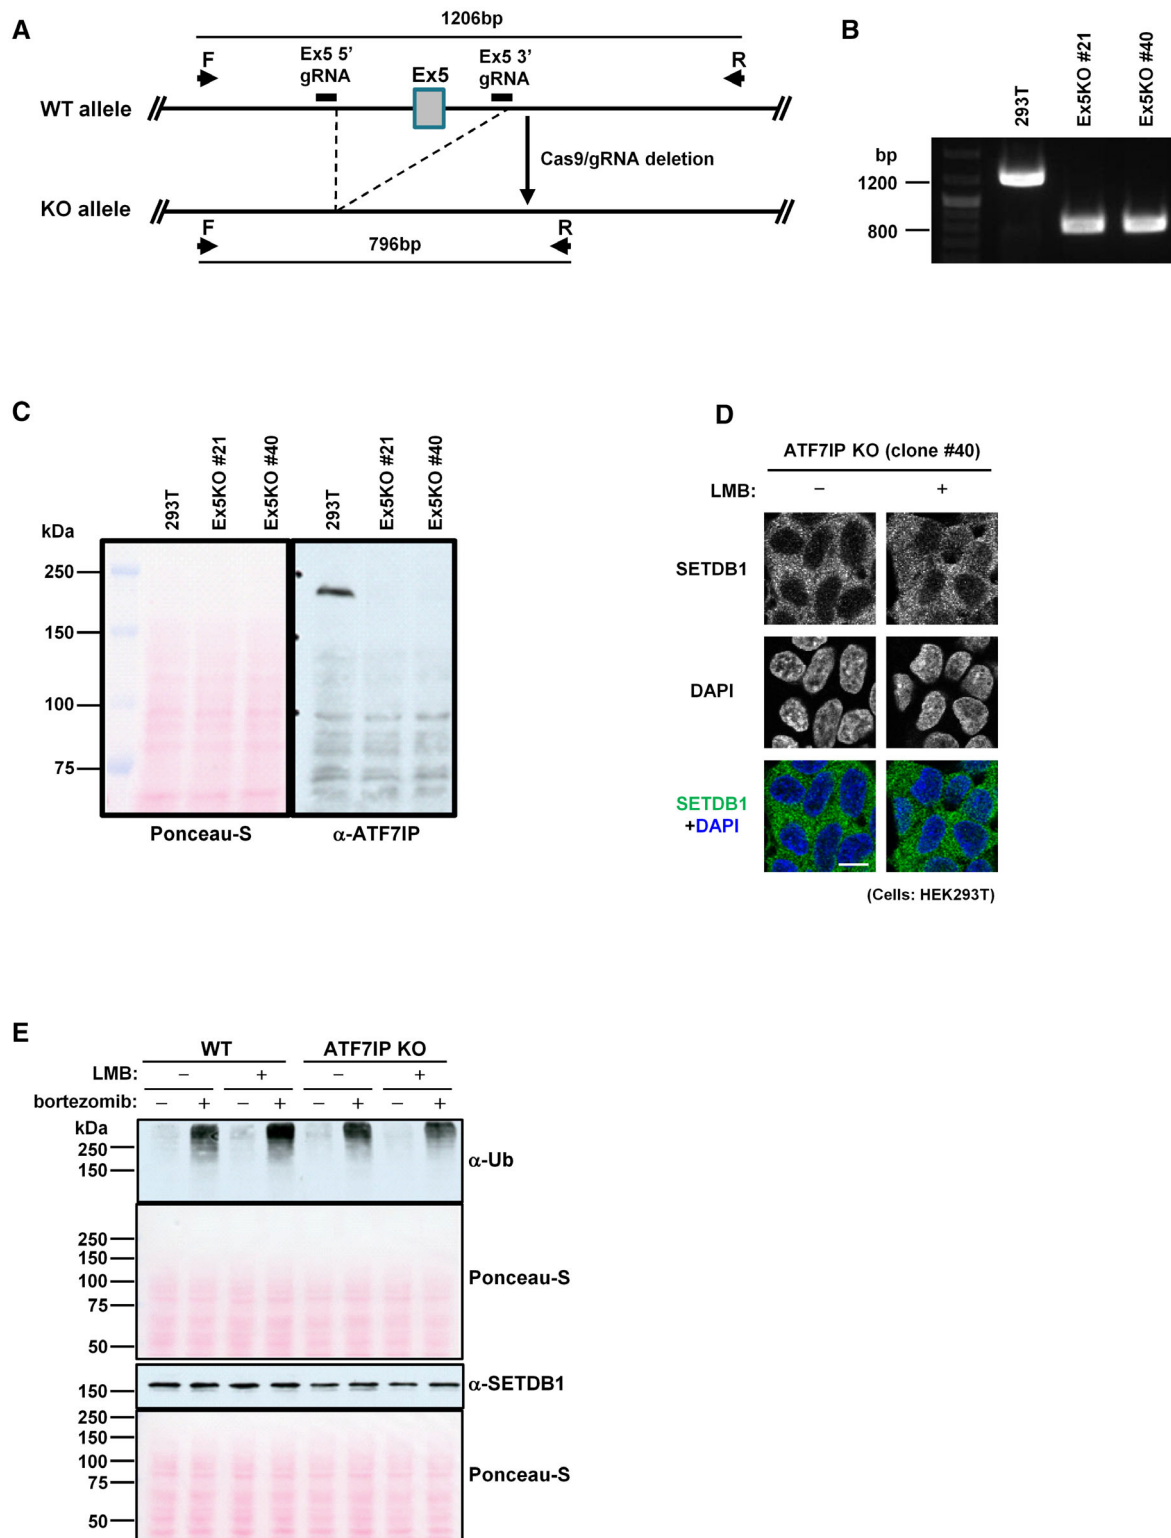

Figure EV3.

**Figure EV3. Establishment and characterization of *ATF7IP* KO HEK293T cells (related to Fig 3).**

- A *ATF7IP* KO strategy by the CRISPR/Cas9 system. If Exon 5(Ex5) of *ATF7IP* is deleted between the 5' and 3' gRNA target sequences, PCR with primer F and R amplifies about 800-bp DNA fragment from the KO allele vs. 1,200 bp from WT allele.
- B PCR validation result of two independent *ATF7IP* KO HEK293T cell clones, #21 and #40.
- C Confirmation of no *ATF7IP* protein expression in two *ATF7IP* KO HEK293T cell clones, #21 and #40. Ponceau-S staining of same blotted membrane used for *ATF7IP* detection. The representative data of two independent experiments are shown.
- D SETDB1 cellular localization in another *ATF7IP* KO HEK293T cell clone, #40 without or with LMB treatment for 5 h. The representative data of multiple independent experiments are shown. Scale bar: 10  $\mu$ m.
- E Impact of bortezomib treatment on cellular protein stability. Same number of WT or *ATF7IP* KO HEK293T cells was aliquoted into the 1.5-ml tubes and untreated or treated with LMB (10 ng/ml) or/and bortezomib (100 nM) for 5 h before analysis which is same condition as used for Fig 3E. Ponceau-S staining of same blotted membrane used for poly-Ub and SETDB1 detection, respectively. The representative data of two independent experiments are shown.

Source data are available online for this figure.

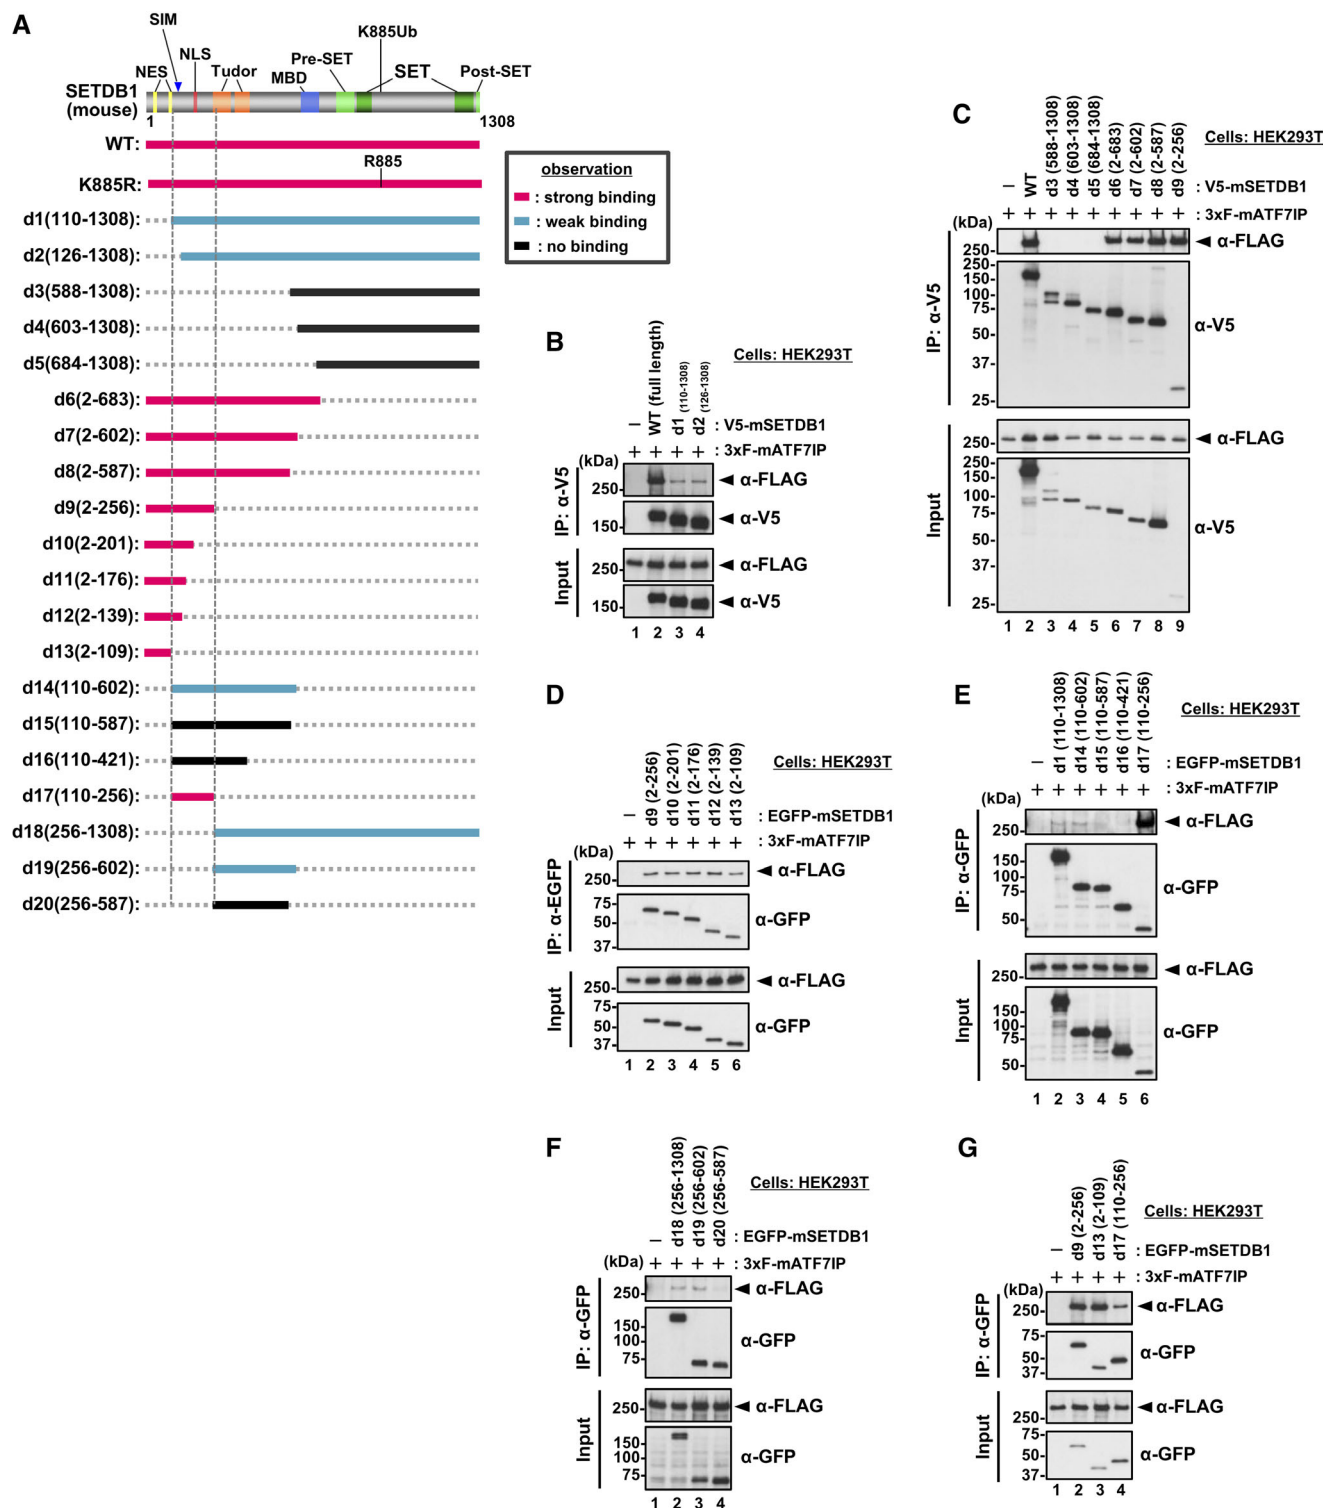

**Figure EV4. Mapping analyses for the identification of ATF7IP-interacting region of SETDB1 (related to Fig 4).**

A Summary of the co-IP experiments. After the transfection, V5-SETDB1 was immune-purified with anti-V5 antibody and used for WB analysis. Location of estimated NES and NLS motifs is shown [23].  
 B-G HEK293T cells were co-transfected with 3xFLAG-ATF7IP and V5-tagged or EGFP-fused SETDB1 WT or deletion mutants as shown in (A). After IP with anti-V5 antibody (B and C) or anti-GFP antibody (D-G), the bound ATF7IP was detected by WB analysis. The residues 2-109 (d13) of SETDB1 are mostly sufficient for the interaction with ATF7IP (C).

Source data are available online for this figure.

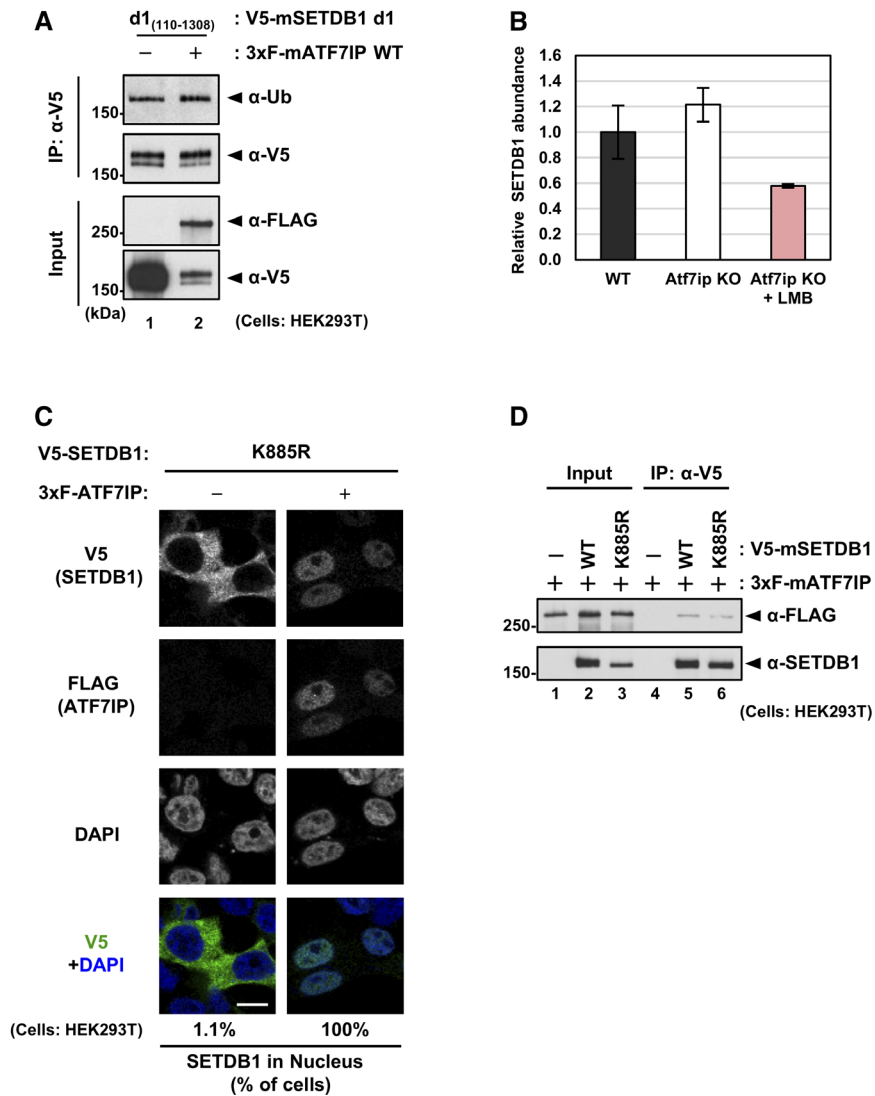

**Figure EV5. Characterization of SETDB1 d1 and K885 mutant, and SETDB1 stability in *Atf7ip* KO treated with LMB (related to Figs 4 and 5).**

- A V5-SETDB1 d1 mutant expression with or without 3xF-ATF7IP co-expression in HEK293T cells as shown in Fig 4B.
- B Measurement of total SETDB1 signals of WT, *Atf7ip* KO, and *Atf7ip* KO treated with LMB shown in Fig 5C top panel. Data from three different samples in a single experiment. Error bars: SD.
- C HEK293T cells were transfected with V5-SETDB1 K885 mutant and either empty or 3xF-ATF7IP expressing vector. Over 50 transfected cells per sample were analyzed. The representative data of two independent experiments are shown. Scale bar: 10  $\mu$ m.
- D HEK293T cells were transfected with 3xF-ATF7IP and either empty, V5-SETDB1 WT, or K885 mutant. After V5-IP, the bound 3xF-ATF7IP was detected by WB analysis.

Source data are available online for this figure.
