# Supplementary material
Source: PubMed Central journal article supplement (PMC6893292)

C

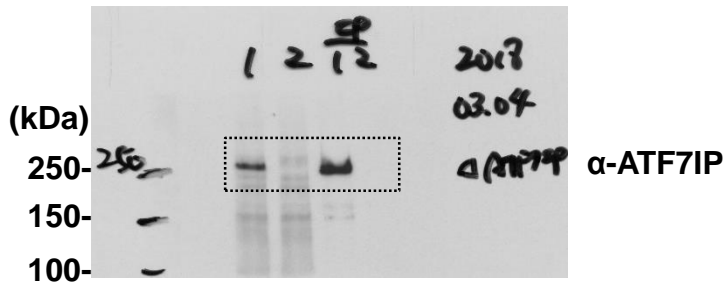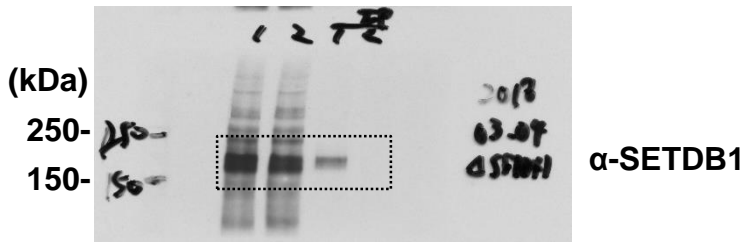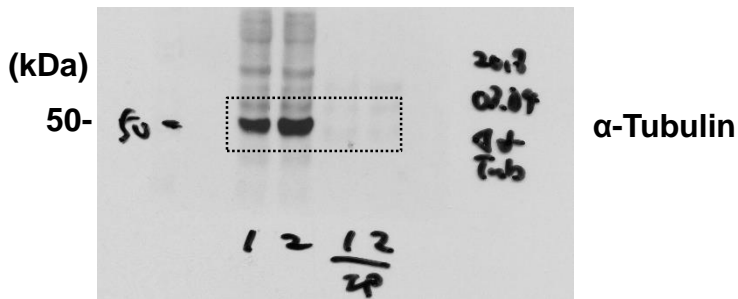

Figure 1

Supplement: EMBR-20-e48297-s004.pdf [file EMBR-20-e48297-s004.pdf]

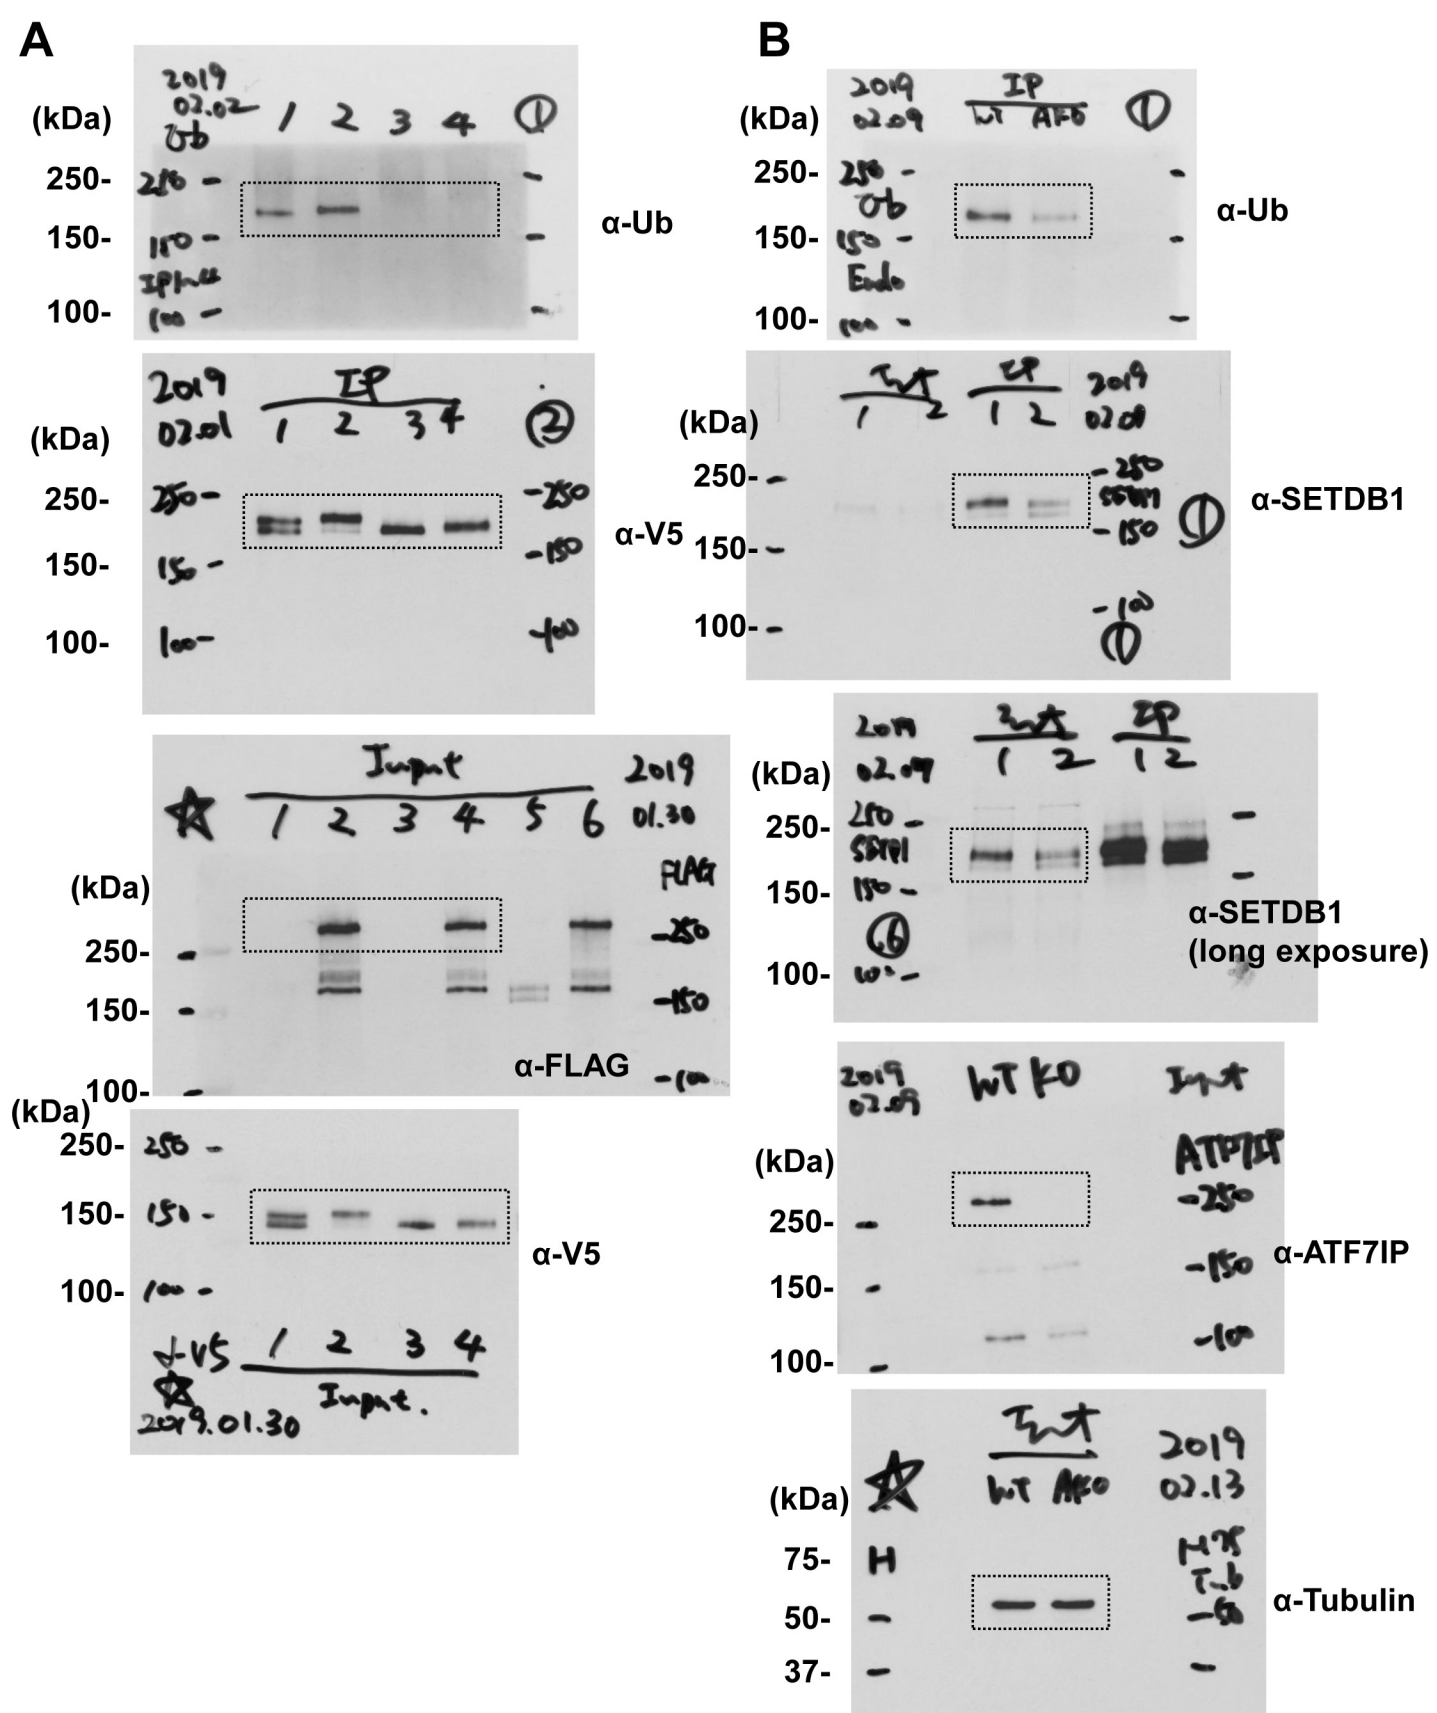

**Figure 5**

**C**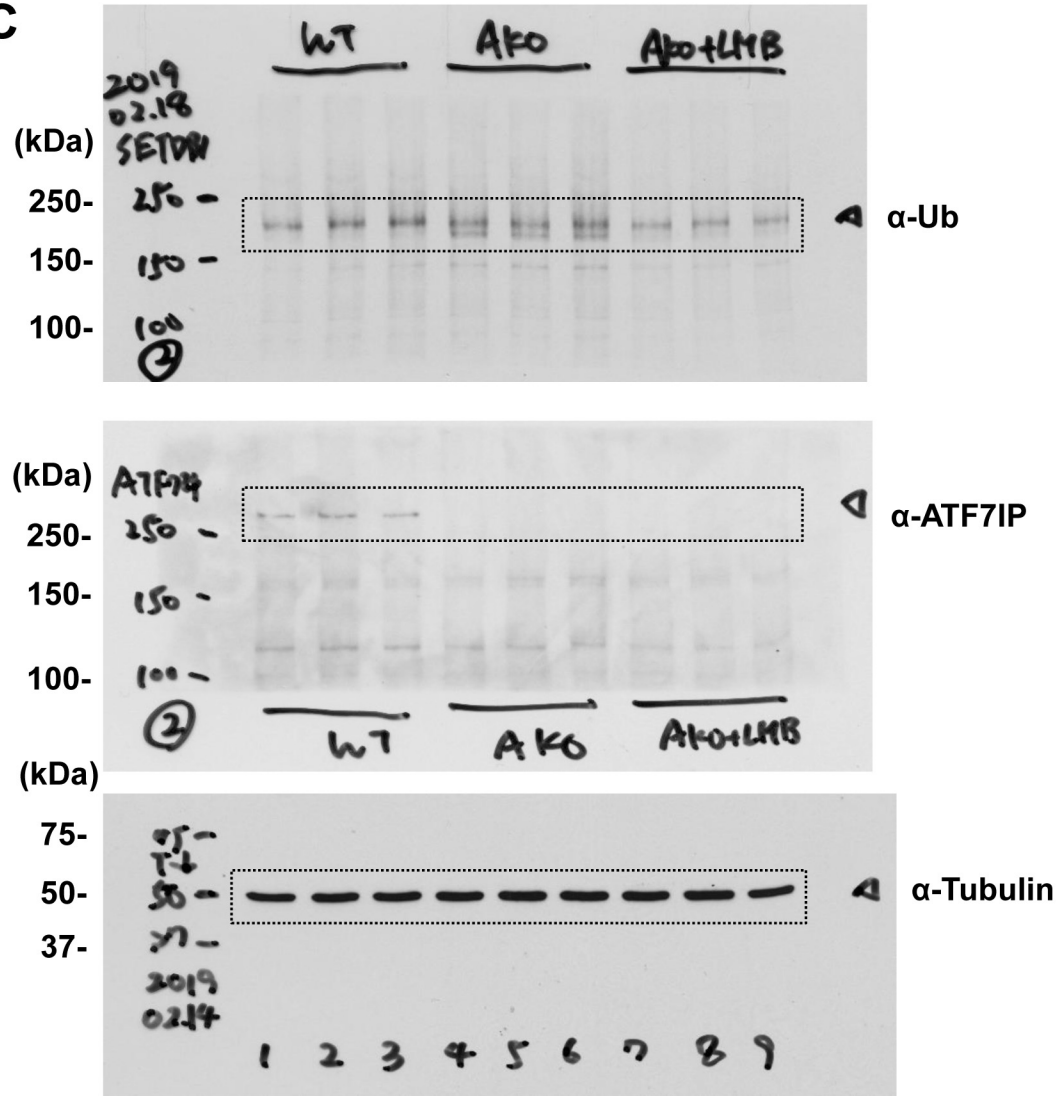**E**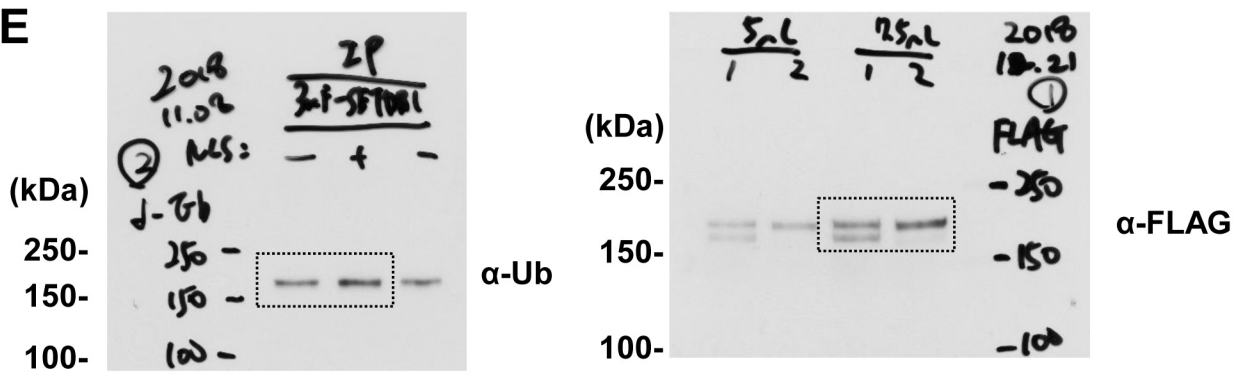**Figure 5**

H

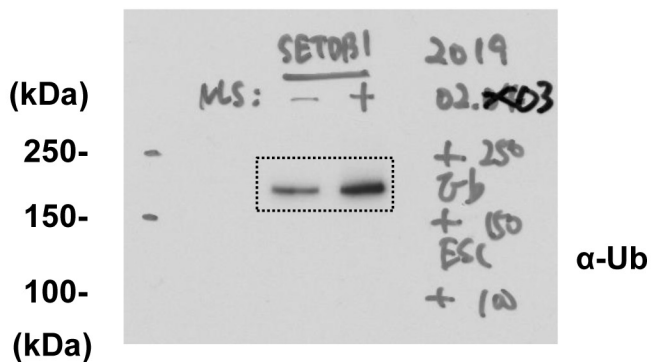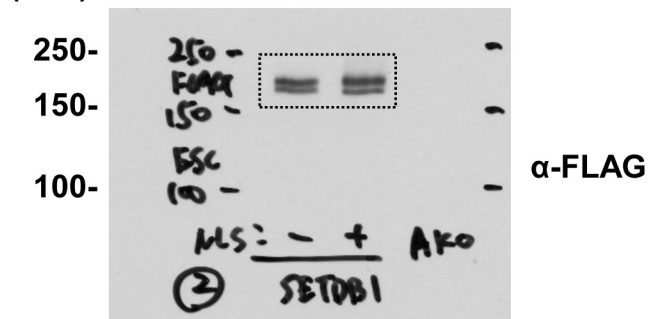

Figure 5

Supplement: EMBR-20-e48297-s005.pdf [file EMBR-20-e48297-s005.pdf]
